# Supplementary material for: TET2-Driven Demethylation of ANG promotes Angiogenesis and Malignant transformation in Oligodendroglioma
Source: Research Square preprint supplement (doi:10.21203/rs.3.rs-8533226/v1), 2026-01-22
Supplement: Supplementary file 1 [file c9b504285c27b1c1646f7bd7.docx]

Supplementary Table and figures

Table S1. Top 15 of most differential survival-associated genes in OG datasets.

| Number of top genes | Gene Symbol | Gene ID | P-Value  (Survival OS) |
| --- | --- | --- | --- |
| 1 | ISL2 | ENSG00000159556.9 | 7.76e-14 |
| 2 | OSR2 | ENSG00000164920.9 | 9.14e-14 |
| 3 | HIST1H3G | ENSG00000273983.1 | 9.39e-14 |
| 4 | WEE1 | ENSG00000166483.10 | 2.49e-13 |
| 5 | TNFRSF11B | ENSG00000164761.8 | 4.93e-13 |
| 6 | CABP4 | ENSG00000175544.13 | 8.50e-13 |
| 7 | TMEM71 | ENSG00000165071.14 | 9.55e-13 |
| 8 | HIST1H2BJ | ENSG00000124635.8 | 1.81e-12 |
| 9 | AF13126.5 | ENSG00000255020.1 | 2.66e-12 |
| 10 | CCDC18 | ENSG00000122483.17 | 3.88e-12 |
| 11 | LINC01023 | ENSG00000272523.1 | 6.62e-12 |
| **12** | **ANG** | **ENSG00000214274.9** | **7.47e-12** |
| 13 | TP31I13 | ENSG00000167543.15 | 7.70e-12 |
| 14 | RP11-622C24.2 | ENSG00000277152.1 | 9.64e-12 |
| 15 | CRTAC1 | ENSG00000095713.13 | 1.18e-11 |

Table S2. 11 CpG probes within the ANG promoter

| cpg sites | HR | L95CI | H95CI | P value |
| --- | --- | --- | --- | --- |
| cg00012199 | 1.78598408137091 | 0.867141305972838 | 3.67845369254063 | 0.115657638400611 |
| cg00968038 | 1.33525857191115 | 0.747550939775573 | 2.38500864489242 | 0.328621635275367 |
| cg01114249 | 1.16131977827467 | 0.661018094037504 | 2.04028246666332 | 0.602951869251225 |
| ***cg02939508*** | ***0.816038744606832*** | ***0.764005851312589*** | ***0.871615356813592*** | ***1.47112012951059e-09*** |
| cg03519263 | 0.742712241199084 | 0.571308350063095 | 0.965540715737911 | 0.0262891869980565 |
| cg04838709 | 0.966170765480571 | 0.717452721556059 | 1.30111144612387 | 0.820714460646112 |
| cg05296180 | 0.548454497735105 | 0.399162975981804 | 0.753582757383738 | 0.000211265204291762 |
| cg07572927 | 1.32887582893506 | 0.886791983201614 | 1.99134746612427 | 0.168270337661316 |
| ***cg10850001*** | ***0.697300379689961*** | ***0.607858276721744*** | ***0.799903263862839*** | ***2.63746865549539e-07*** |
| cg15927878 | 0.788417018506914 | 0.515914856912896 | 1.20485267431692 | 0.271903157633211 |
| cg16154578 | 0.723045731002289 | 0.489776267376969 | 1.06741621418388 | 0.102744503397405 |
| cg18321533 | 0.854486517637453 | 0.554765564687083 | 1.31613650035402 | 0.475517373678535 |
| ***cg19211827*** | ***0.692296717682928*** | ***0.630239665678557*** | ***0.760464266873042*** | ***1.65903319376014e-14*** |
| ***cg21882356*** | ***0.564093113998198*** | ***0.49445418390633*** | ***0.643539991402852*** | ***1.64721606667705e-17*** |
| cg22784964 | 2.25566791847397 | 1.08949131752151 | 4.67010399863258 | 0.0284659909566118 |
| cg22862526 | 1.12859034466694 | 0.760960244558457 | 1.67382747677511 | 0.547476139434642 |
| cg25327013 | 1.2247206092665 | 0.680442007681816 | 2.20436209673799 | 0.499032769606998 |


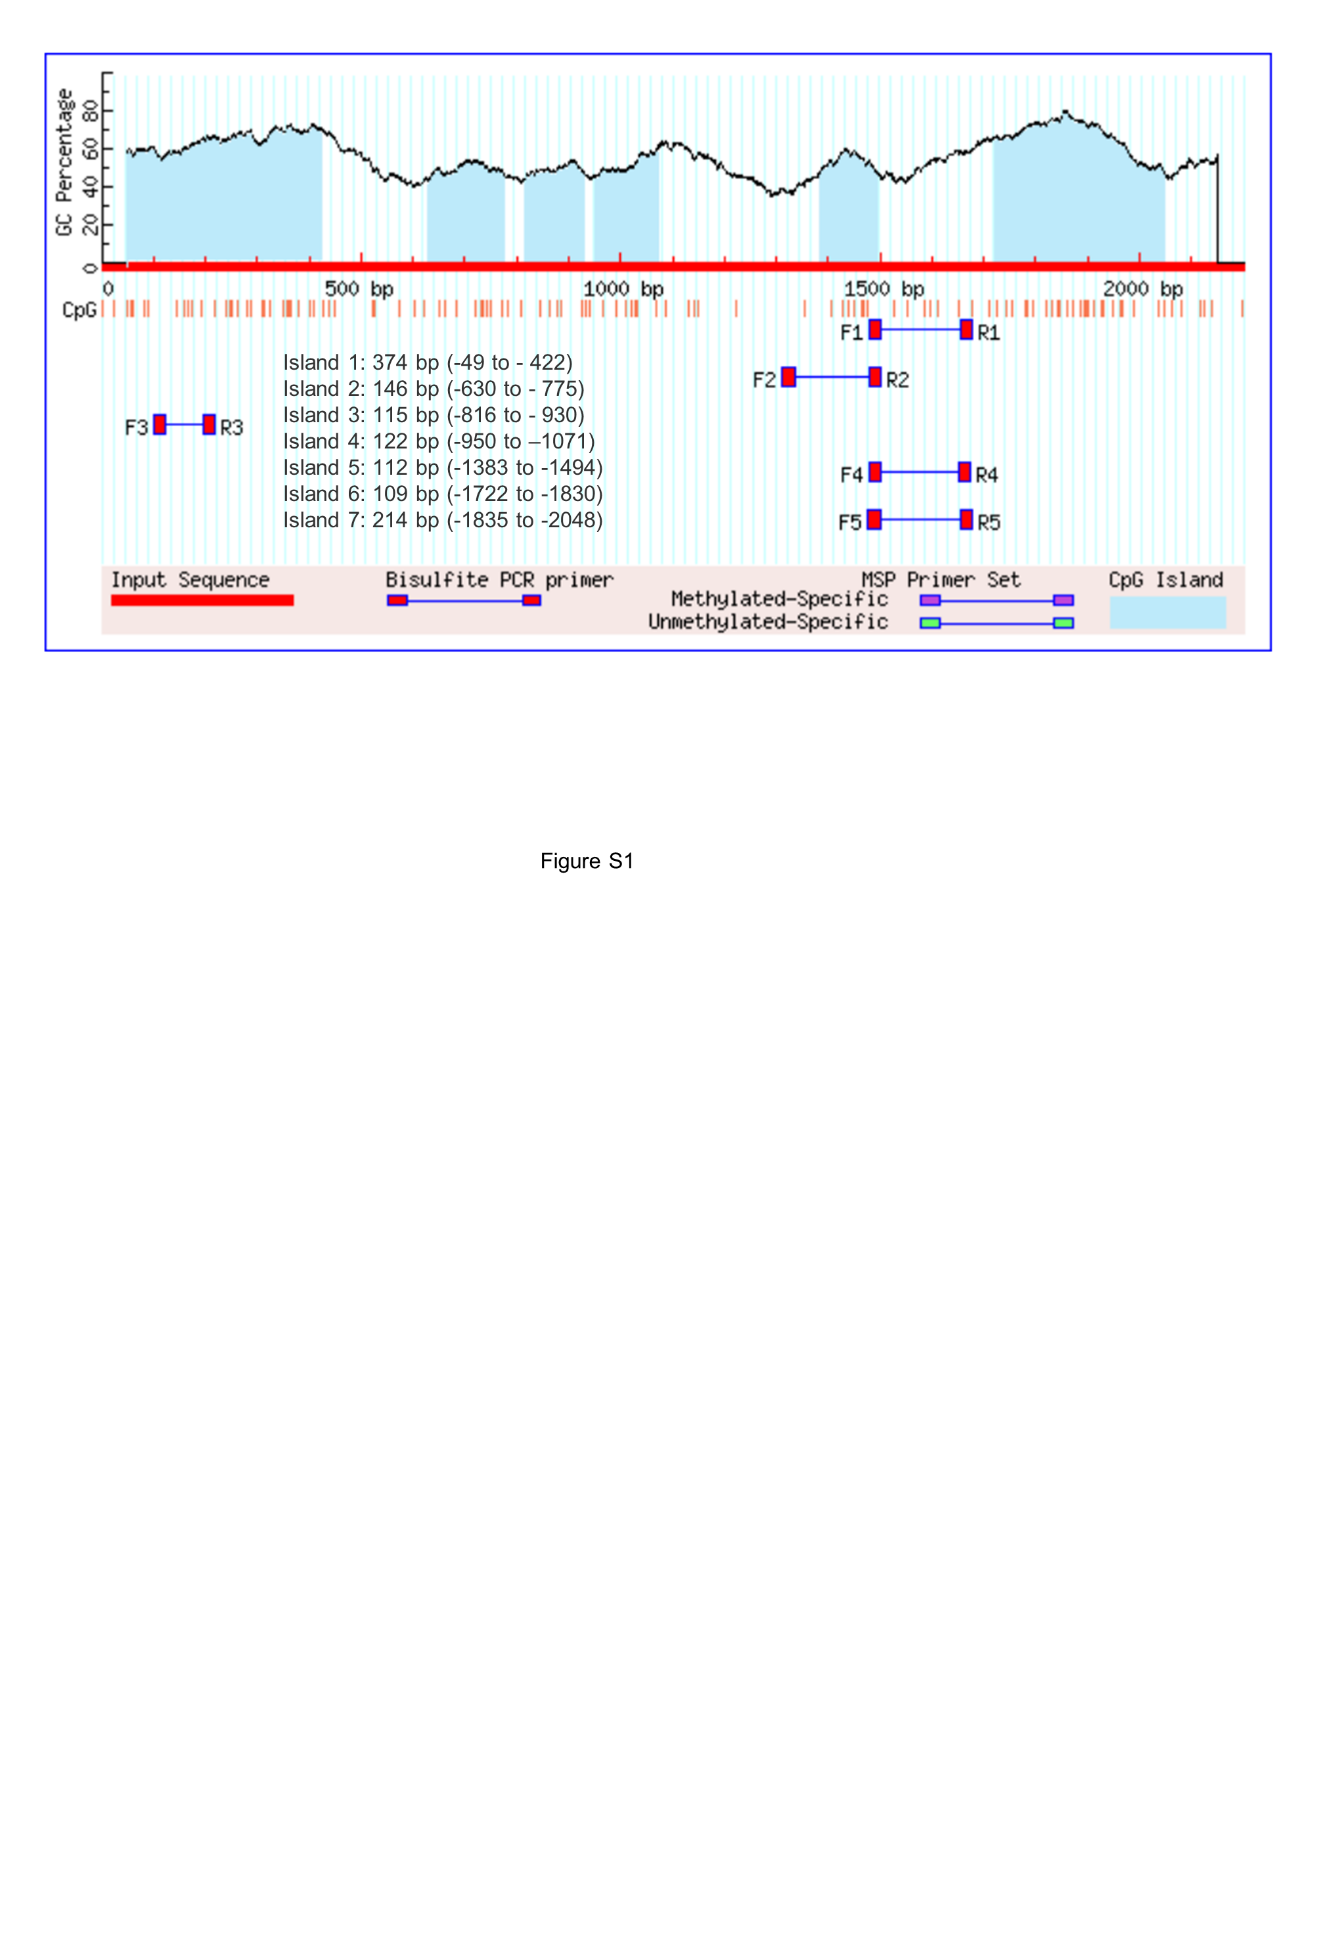


**Figure S1.** The Analysis of the CpG islands in the promoter region of the ANG gene using the UCSC database.


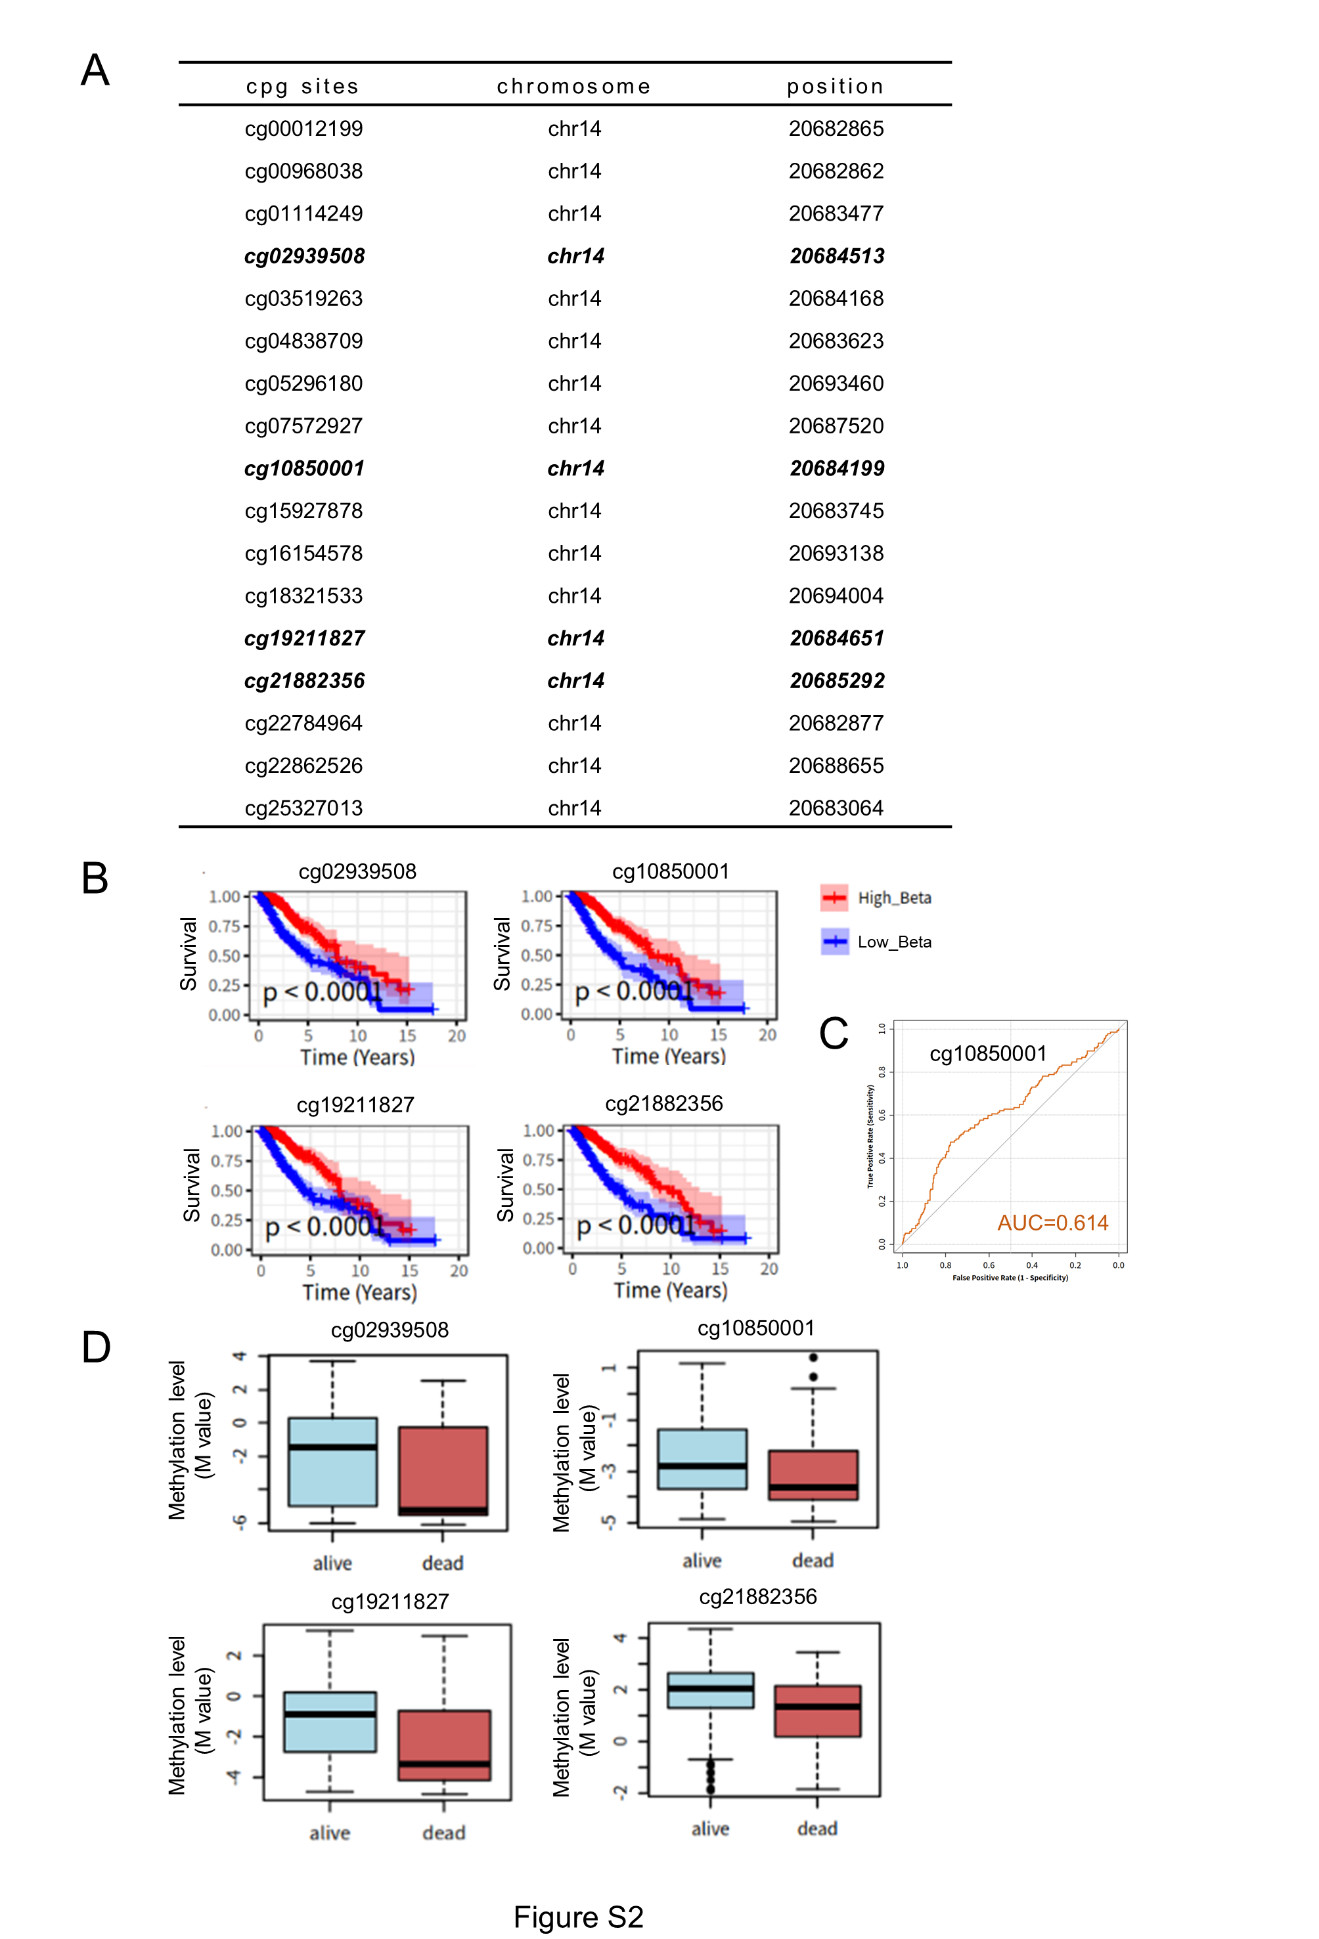


**Figure S2.** UCSC-based screening of CpG sites within the ANG promoter region associated with survival in LGG. (A) Methylation probe sites located in the ANG promoter were identified within the ANG promoter region. DNA methylation β-values were converted to M-values, and methylation sites associated with patient survival were calculated using univariate Cox regression to identify key CpG sites. (B) A prognostic model was constructed to evaluate the relationship between high methylation at the identified sites and patient survival. (C) A binary classification model for patient survival was established, and the AUC was calculated. (D) Differences in DNA methylation levels at the target CpG sites were compared between deceased patients and those with prolonged survival.


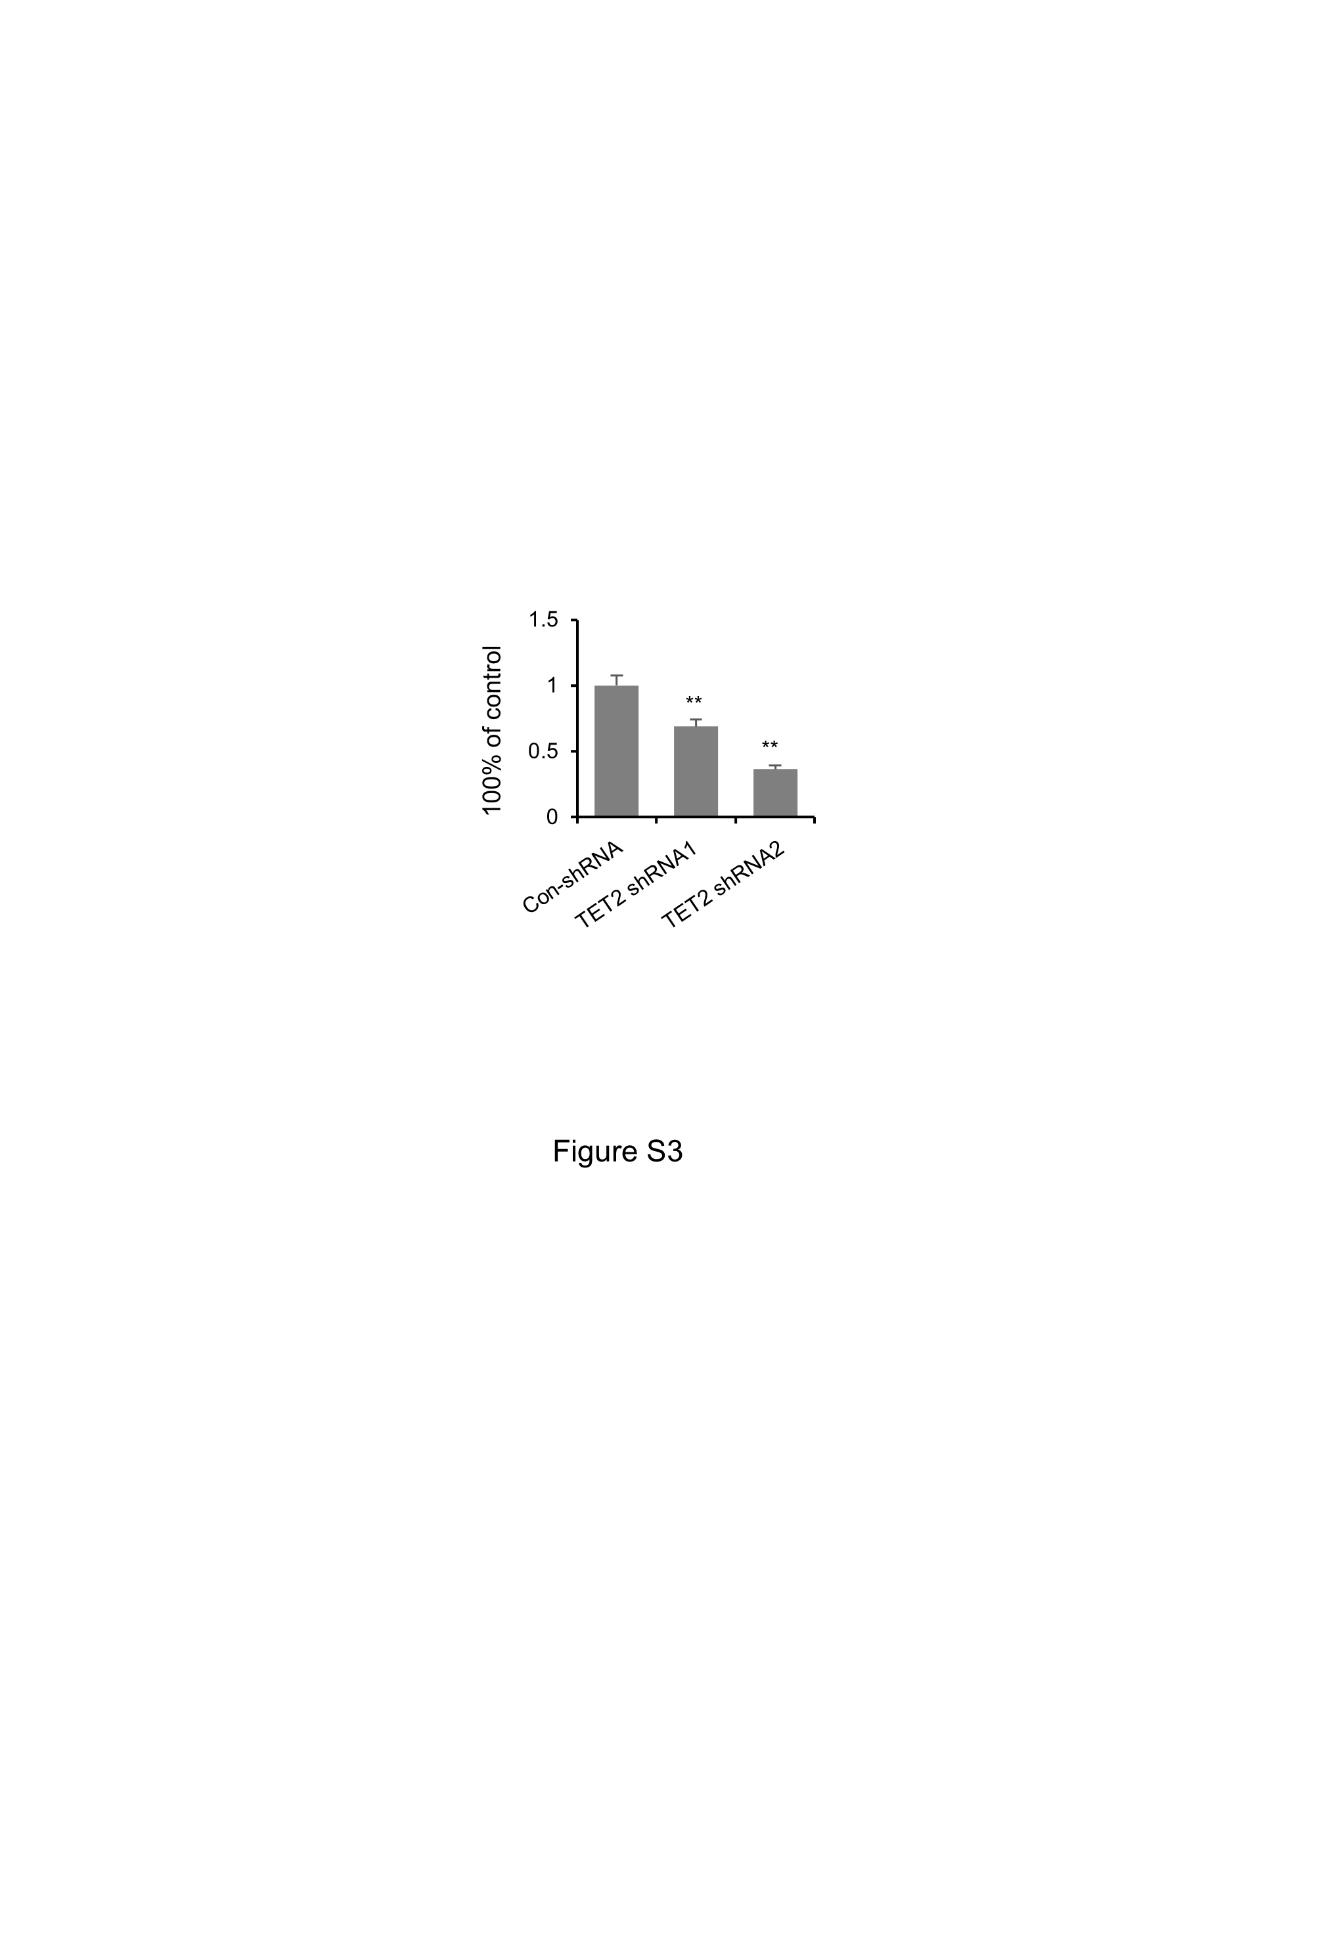


**Figure S3.** qPCR validation showing that shRNA2 achieved the most efficient TET2 knockdown.


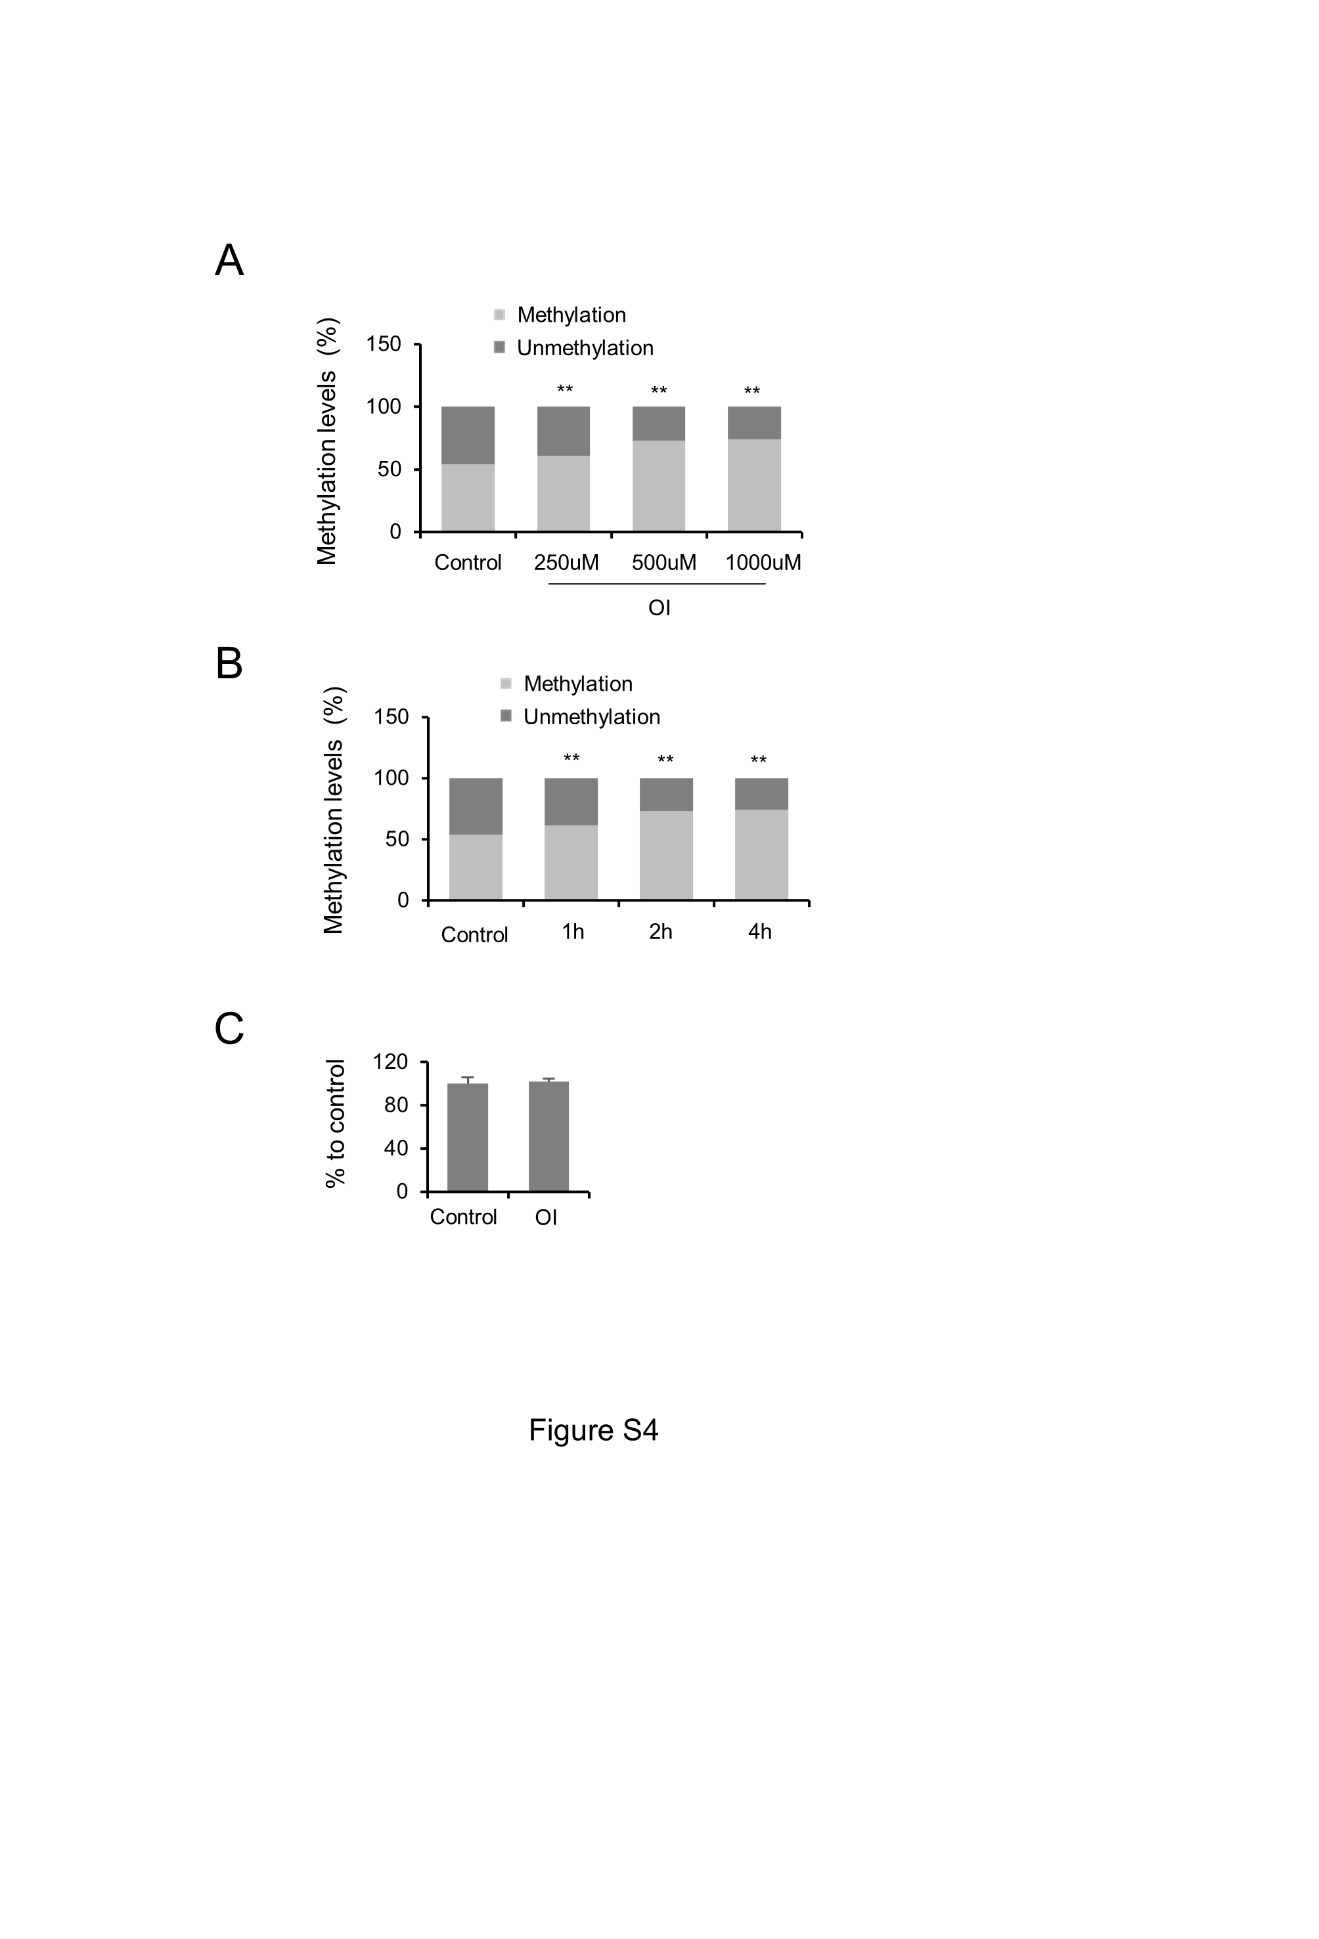


**Figure S4.** Optimization of the treatment duration and dose of OI for modulating TET2 expression. (A) OG cells were treated with OI at 250, 500, or 1000 μM for 2 h, followed by qPCR and Western blot analyses to assess changes in methylation levels. (B) OG cells were treated with 500 μM OI for 1, 2, or 4 h, and changes in methylation levels were examined by qPCR and Western blotting.


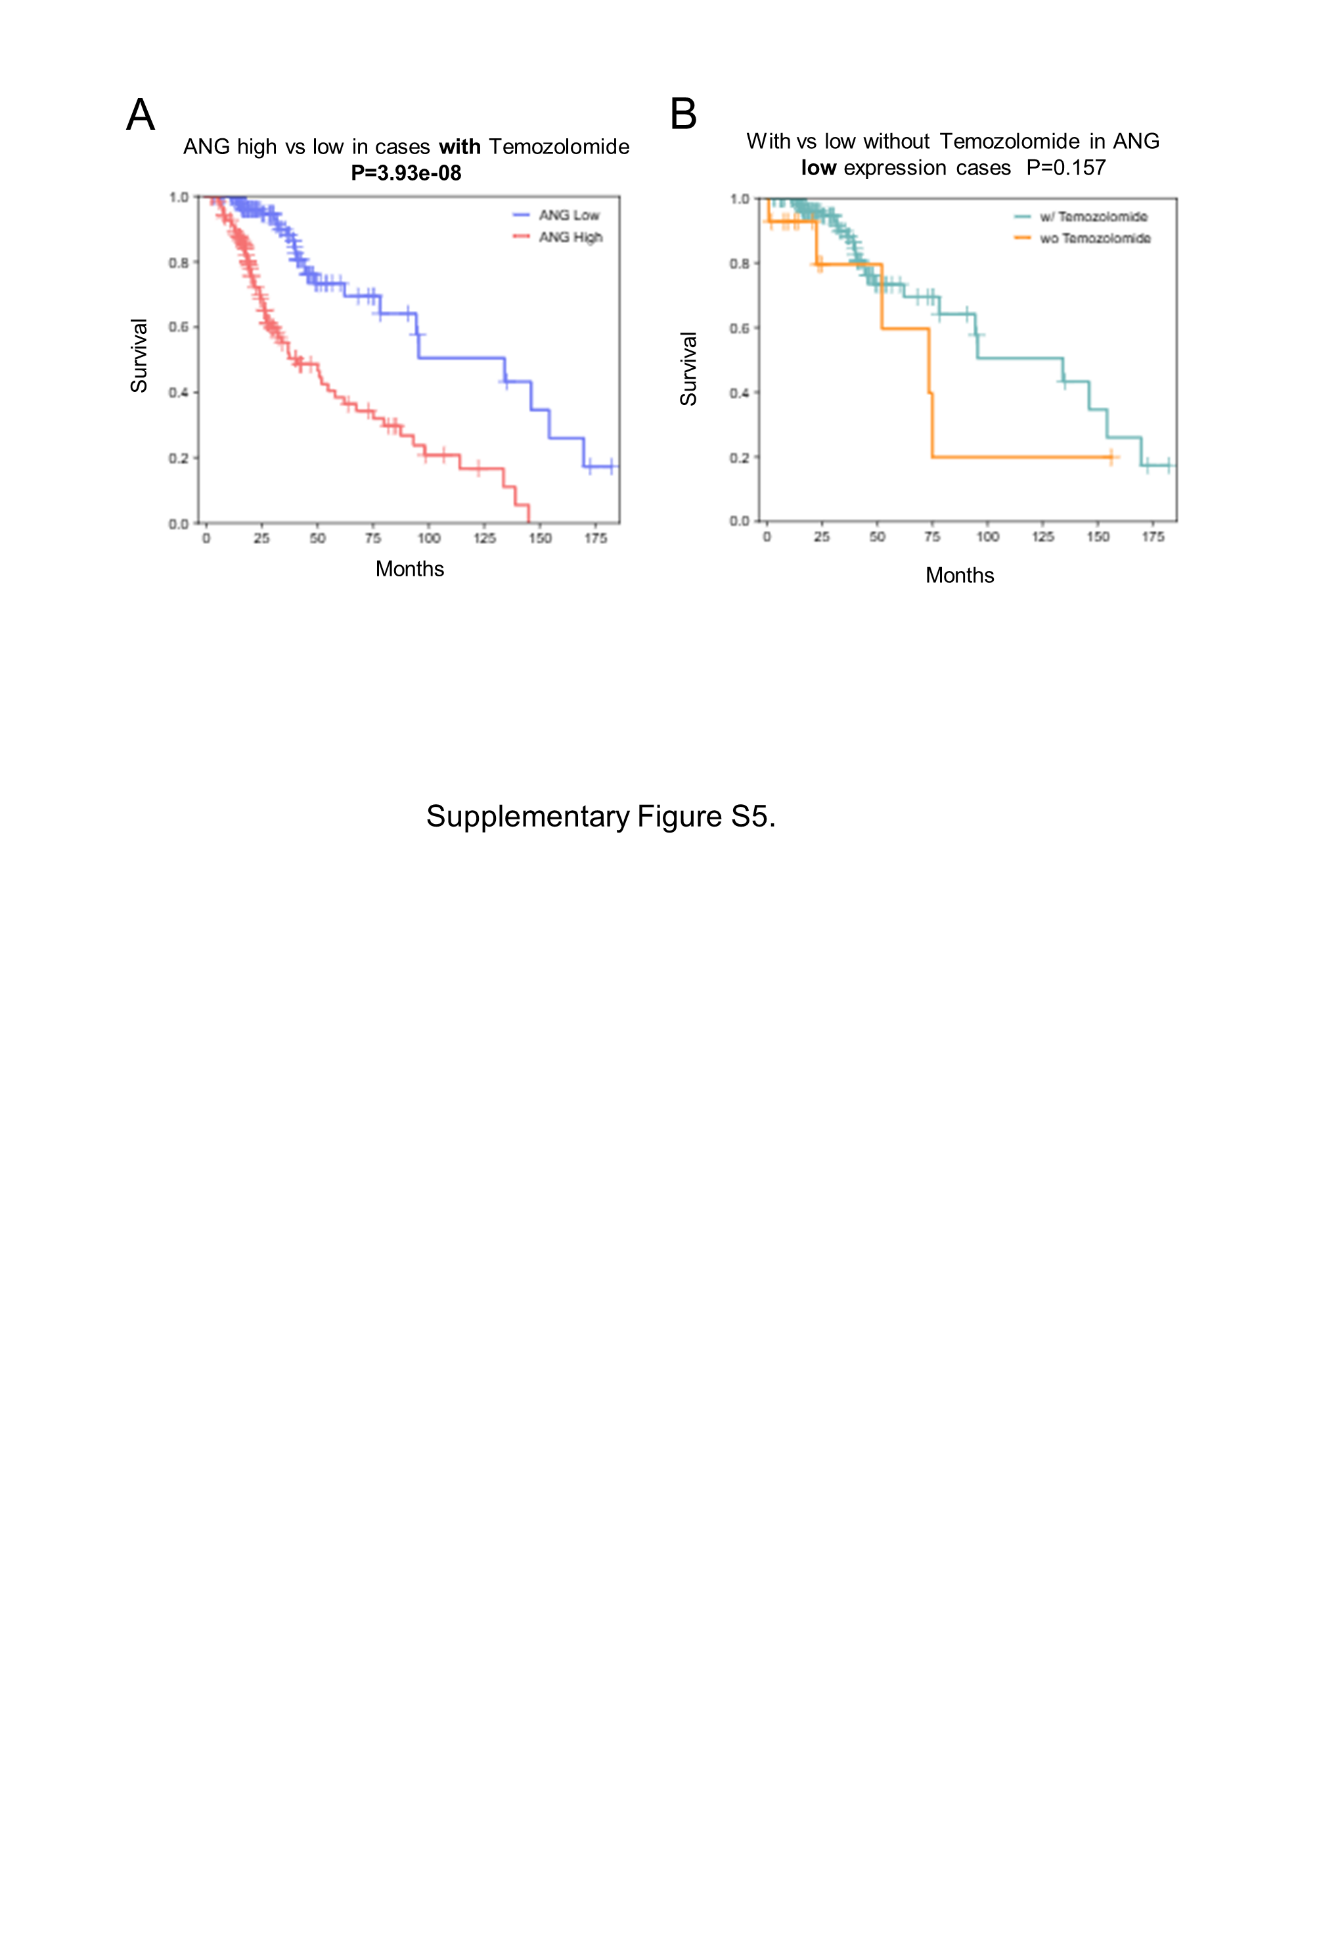


**Figure S5.** The analysis of the relationship between the expression level of ANG and the therapeutic efficacy of Temozolomide, by GEPIA3 database.
